# Supplementary material
Source: MDPI journal article supplement (https://www.mdpi.com/2079-6412/10/2/185)
Supplement: s1 [file s1]

## Supplementary Information

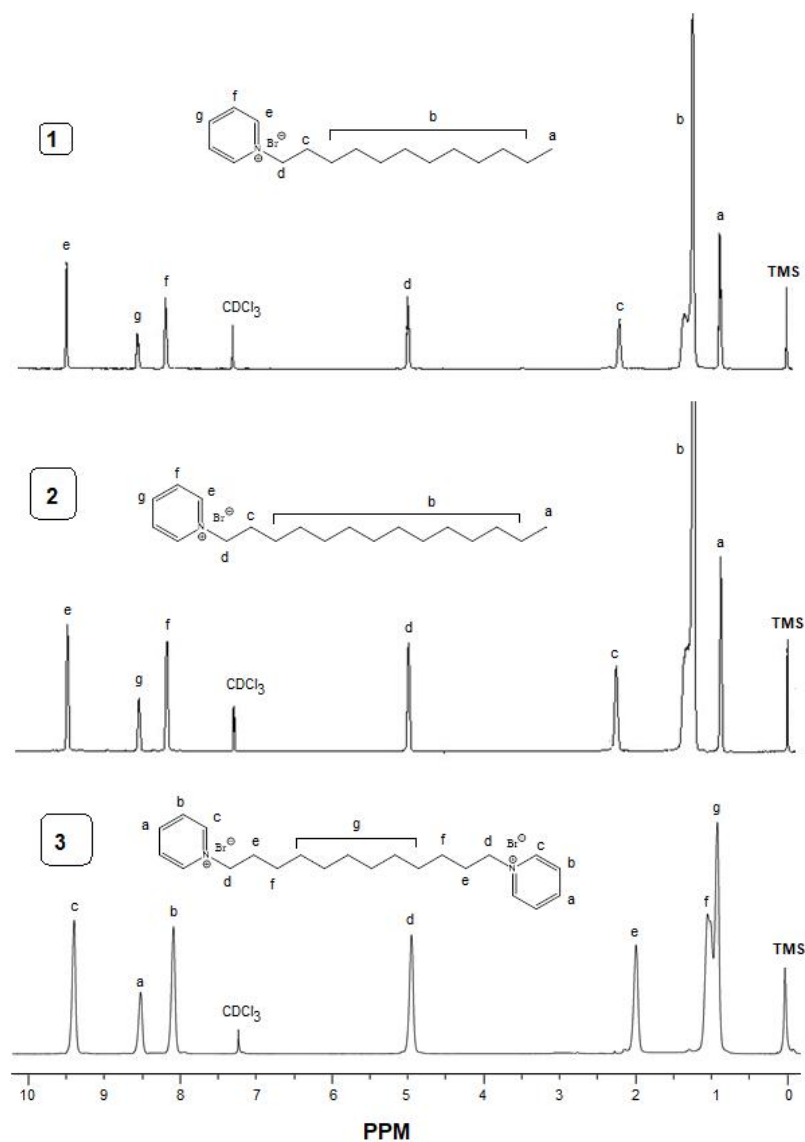

**Figure S1:**  $^1\text{H}$  NMR spectra of synthesized DDPB (1), TDPB (2) and DDBPB (3) corrosion inhibitors.

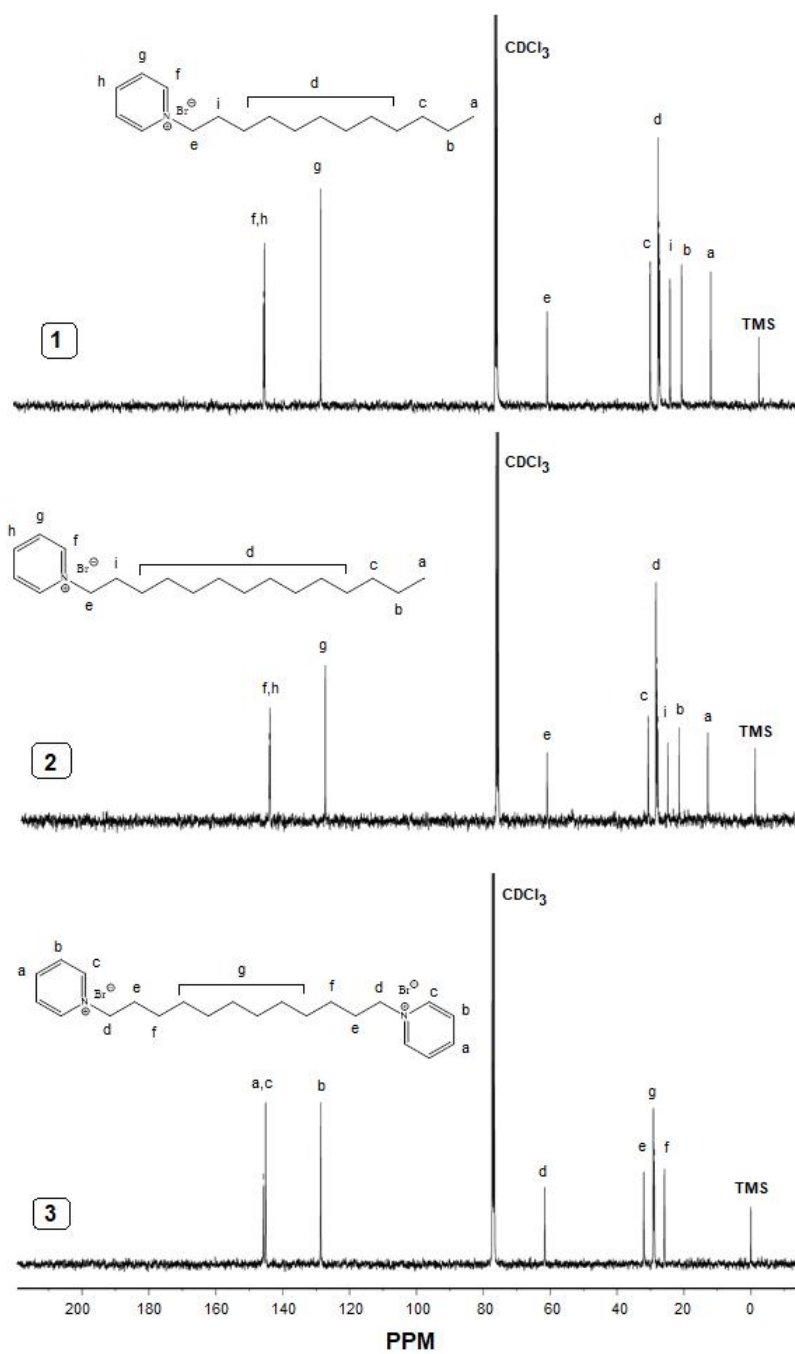

**Figure S2:**  $^{13}\text{C}$  NMR spectra of synthesized DDPB (1), TDPB (2) and DDBPB (3) corrosion inhibitors.

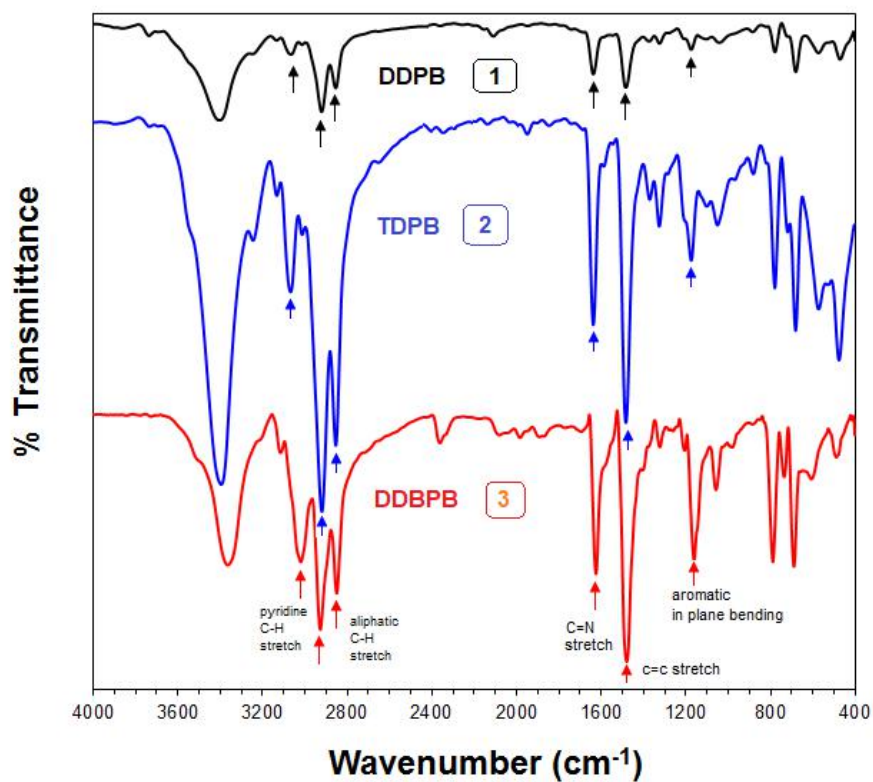

Figure 3. FTIR spectra of synthesized DDPB (1), TDPB (2) and DDBPB (3) corrosion inhibitors.

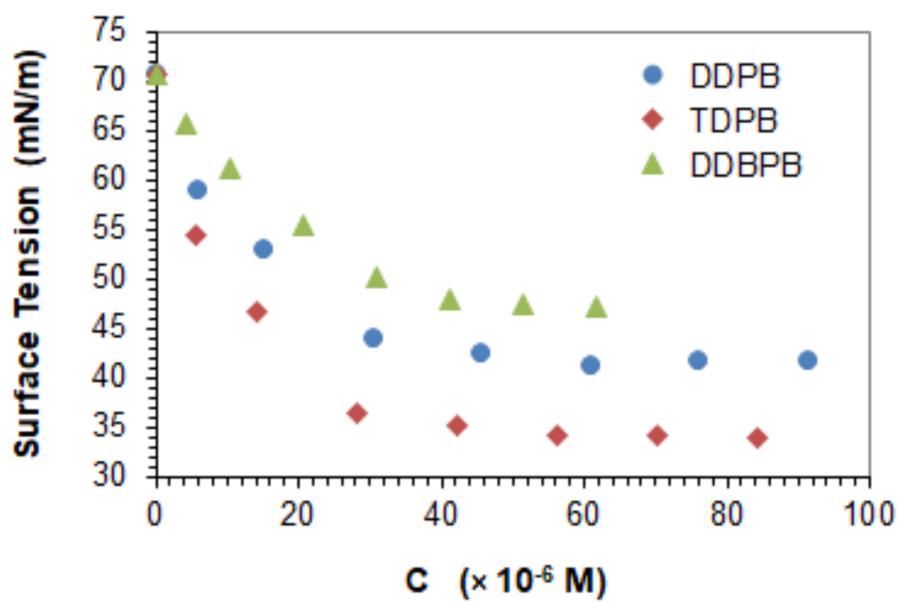

Figure S4: Surface tension versus concentration of DDPB, TDPB and DDBPB in 1 M HCl solution at 25 °C.

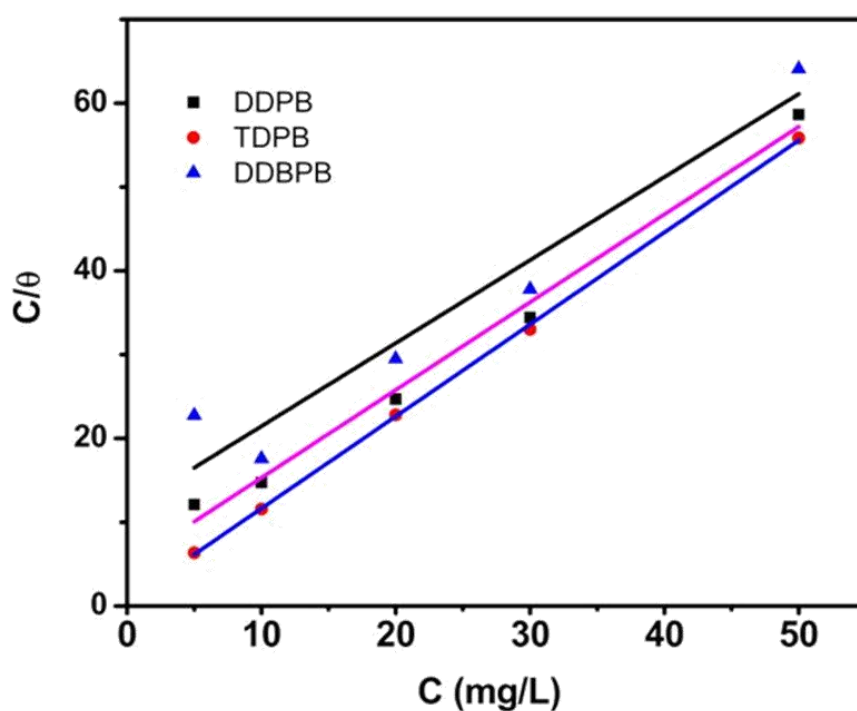

**Figure S5:** Langmuir adsorption isotherms for DDPB, TDPB and DDBPB on X-60 mild steel in 1 M HCl solution at 25 °C.

**Table 1.** Surface properties of compounds DDPB, TDPB and DDBPB in 1M HCl solutions at 25 °C.

| Compound | Surface tension (mN/ m) | $C_{cmc}$ ( $\mu\text{mol/L}$ ) | $C_{cmc}$ (mg/L) | $\Delta G_{mlc}^{\circ}$ (kJ /mol) |
|----------|-------------------------|---------------------------------|------------------|------------------------------------|
| DDPB     | 42.5                    | 33.5                            | 11.0             | −25.5                              |
| TDPB     | 35.0                    | 30.1                            | 10.7             | −25.8                              |
| DDBPB    | 47.9                    | 35.2                            | 17.2             | −25.4                              |

**Table 2.** Adsorption isotherm of DDPB, TDPB and DDBPB in 1 M HCl on X-60 mild steel at 25 °C.

| Inhibitors | $R^2$ | Slope | Intercept | $K_{ads}$ (L/mg) | $\Delta G^{\circ}$ (kJ/mol) |
|------------|-------|-------|-----------|------------------|-----------------------------|
| DDPB       | 0.990 | 1.05  | 4.84      | 0.21             | −38.1                       |
| TDPB       | 0.999 | 1.10  | 0.67      | 1.49             | −33.3                       |
| DDBPB      | 0.922 | 0.99  | 11.6      | 0.09             | −40.3                       |

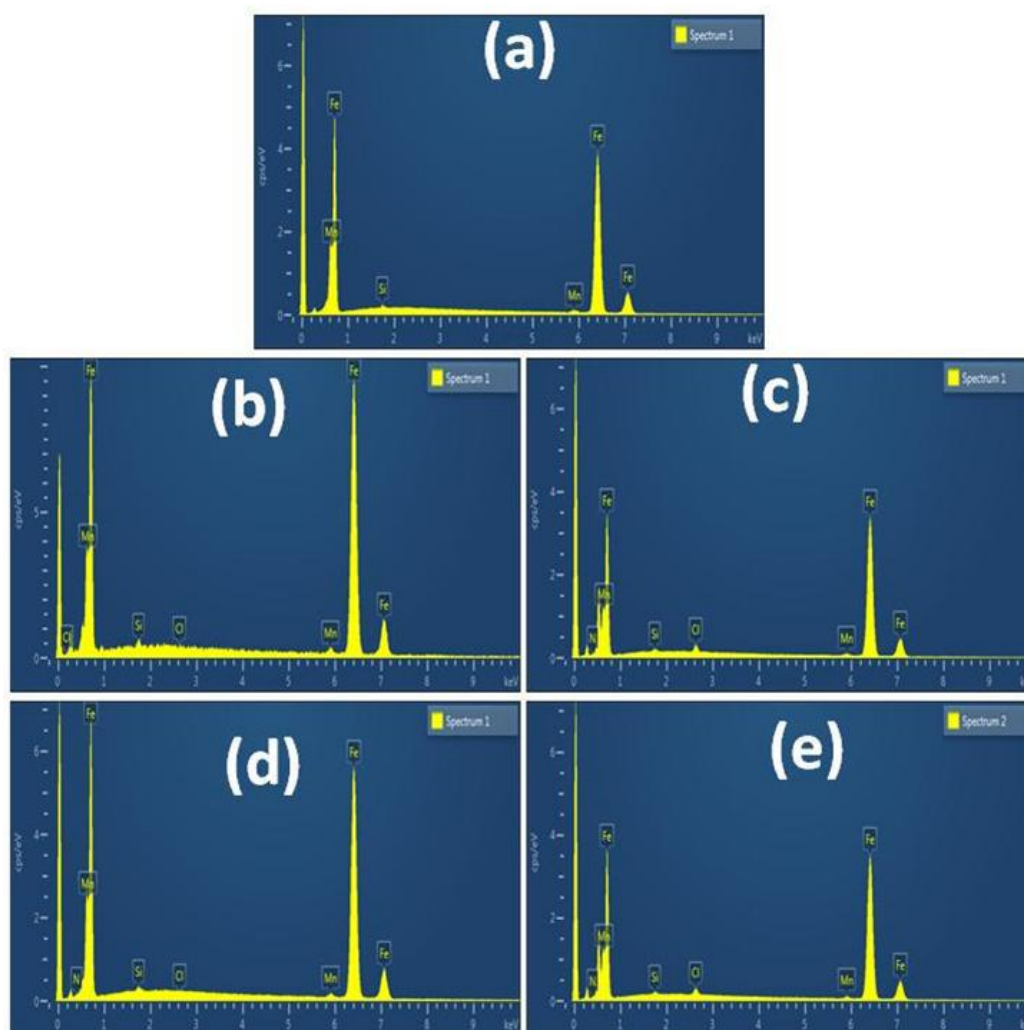

**Figure 6.** EDX spectra of X-60 mild steel in absence and presence of 30 mg/L corrosion inhibitors after complete immersion in 1 M HCl for 24 h at 25 °C; (a) Polished X-60 mild steel, (b) X-60 in 1 M HCl in the absence of inhibitor, and X-60 in 1 M HCl in the presence of (c) DDPB, (d) TDPB and (e) DDBPB.
